# Supplementary material
Source: HighWire-hosted journal article supplement (https://jnm.snmjournals.org/highwire/filestream/108223/field_highwire_adjunct_files/0/263033_Supplemental_Data.pdf)
Supplement: 263033_Supplemental_Data.pdf [file 263033_Supplemental_Data.pdf]

**Supplemental Table 1. Cox proportional hazards regression analysis for all-cause mortality in patients with ALCA.**

| Variables                                          | Univariate |              |          | Multivariate |              |          |
|----------------------------------------------------|------------|--------------|----------|--------------|--------------|----------|
|                                                    | HR         | 95% CI       | <i>P</i> | HR           | 95% CI       | <i>P</i> |
| Positive myocardial <sup>11</sup> C-PiB PET uptake | 4.441      | 1.505–13.110 | 0.007    | 3.382        | 1.011–11.316 | 0.048    |
| Age, years                                         | 1.066      | 1.013–1.122  | 0.014    | 1.033        | 0.968–1.102  | 0.323    |
| Male                                               | 3.183      | 1.372–7.383  | 0.007    | 3.020        | 1.266–7.206  | 0.013    |
| Systolic blood pressure, mmHg                      | 0.989      | 0.963–1.017  | 0.441    |              |              |          |
| LV ejection fraction, %                            | 0.969      | 0.940–0.999  | 0.041    | 0.958        | 0.919–0.999  | 0.046    |
| E/e' ratio                                         | 1.032      | 0.995–1.071  | 0.093    |              |              |          |
| Autologous PBSCT                                   | 0.114      | 0.015–0.845  | 0.034    | 0.224        | 0.024–2.112  | 0.191    |

<sup>11</sup>C-PiB PET, <sup>11</sup>C-Pittsburgh compound B positron emission tomography; CI, confidence interval; E/e', early diastolic transmitral inflow velocity to early diastolic septal mitral annular tissue velocity ratio; HR, hazard ratio; LV, left ventricular; PBSCT, peripheral blood stem cell transplantation.

**Supplemental Table 2. Net reclassification improvement and integrated discrimination improvement for prediction of all-cause mortality.**

| <b>Model</b>                                                 | <b>NRI</b> | <b>95% CI</b> | <b><i>P</i></b> | <b>IDI</b> | <b>95% CI</b> | <b><i>P</i></b> |
|--------------------------------------------------------------|------------|---------------|-----------------|------------|---------------|-----------------|
| Troponin I $\geq 0.1$ ng/mL plus $^{11}\text{C}$ -PiB PET/CT | 0.861      | 0.299–1.420   | 0.003           | 0.200      | 0.066–0.334   | 0.004           |
| NT-proBNP $\geq 1800$ pg/mL plus $^{11}\text{C}$ -PiB PET/CT | 0.914      | 0.383–1.445   | <0.001          | 0.156      | 0.056–0.256   | 0.002           |
| dFLC $\geq 180$ mg/mL plus $^{11}\text{C}$ -PiB PET/CT       | 0.987      | 0.202–1.173   | 0.006           | 0.108      | 0.021–0.196   | 0.015           |

$^{11}\text{C}$ -PiB PET/CT,  $^{11}\text{C}$ -Pittsburgh compound B positron emission tomography/computed tomography; CI, confidence interval; dFLC, an absolute difference between the involved and uninvolved free light chain; IDI, integrated discrimination improvement; NRI, net reclassification improvement; NT-proBNP, N-terminal pro-B-type natriuretic peptide.

|                                                                  |                                                                                   |                                                                                   |                                                                                    |                                                                                     |
|------------------------------------------------------------------|-----------------------------------------------------------------------------------|-----------------------------------------------------------------------------------|------------------------------------------------------------------------------------|-------------------------------------------------------------------------------------|
| <sup>11</sup> C-PiB PET/CT                                       | 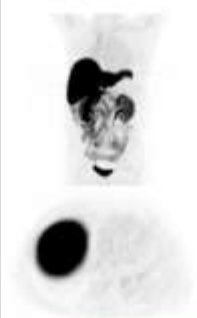 |  |  |  |
|                                                                  |  |  |  |  |
| <b>Grade</b>                                                     | <b>0</b>                                                                          | <b>1</b>                                                                          | <b>2</b>                                                                           | <b>3</b>                                                                            |
| <b>Visual estimation</b>                                         | <b>Negative</b>                                                                   | <b>Positive</b>                                                                   | <b>Positive</b>                                                                    | <b>Positive</b>                                                                     |
| <b>Description</b>                                               | Myocardial uptake not discernible from blood pool                                 | Myocardial uptake much lower than liver                                           | Myocardial uptake Mildly lower than liver                                          | Myocardial uptake similar to or higher than liver                                   |
| <b>Myocardial SUV<sub>peak</sub></b>                             | 1.77±0.41<br>[0.97–2.61]                                                          | 2.40±0.65<br>[1.53–3.68]                                                          | 5.19±2.11<br>[3.21–10.87]                                                          | 8.66±2.38<br>[5.48–12.02]                                                           |
| <b>Myocardial SUV<sub>peak</sub>-to-mean LV blood pool ratio</b> | 1.57±0.14<br>[1.43–1.81]                                                          | 2.81±0.71<br>[1.58–4.23]                                                          | 4.99±1.32<br>[3.06–7.13]                                                           | 6.57±1.57<br>[4.03–8.83]                                                            |

**Supplemental Figure 1. Interpretations of <sup>11</sup>C-PiB PET/CT by visual estimation.**

A myocardial uptake of <sup>11</sup>C-PiB that was discernible from the blood pool (i.e., LV cavity) was considered positive. Specifically, a myocardial uptake of grade 1 or higher was considered a positive myocardial <sup>11</sup>C-PiB uptake on the visual estimation.

<sup>11</sup>C-PiB PET/CT, <sup>11</sup>C-Pittsburgh compound B positron emission tomography/computed tomography; LV, left ventricular; SUV, standardized uptake value.



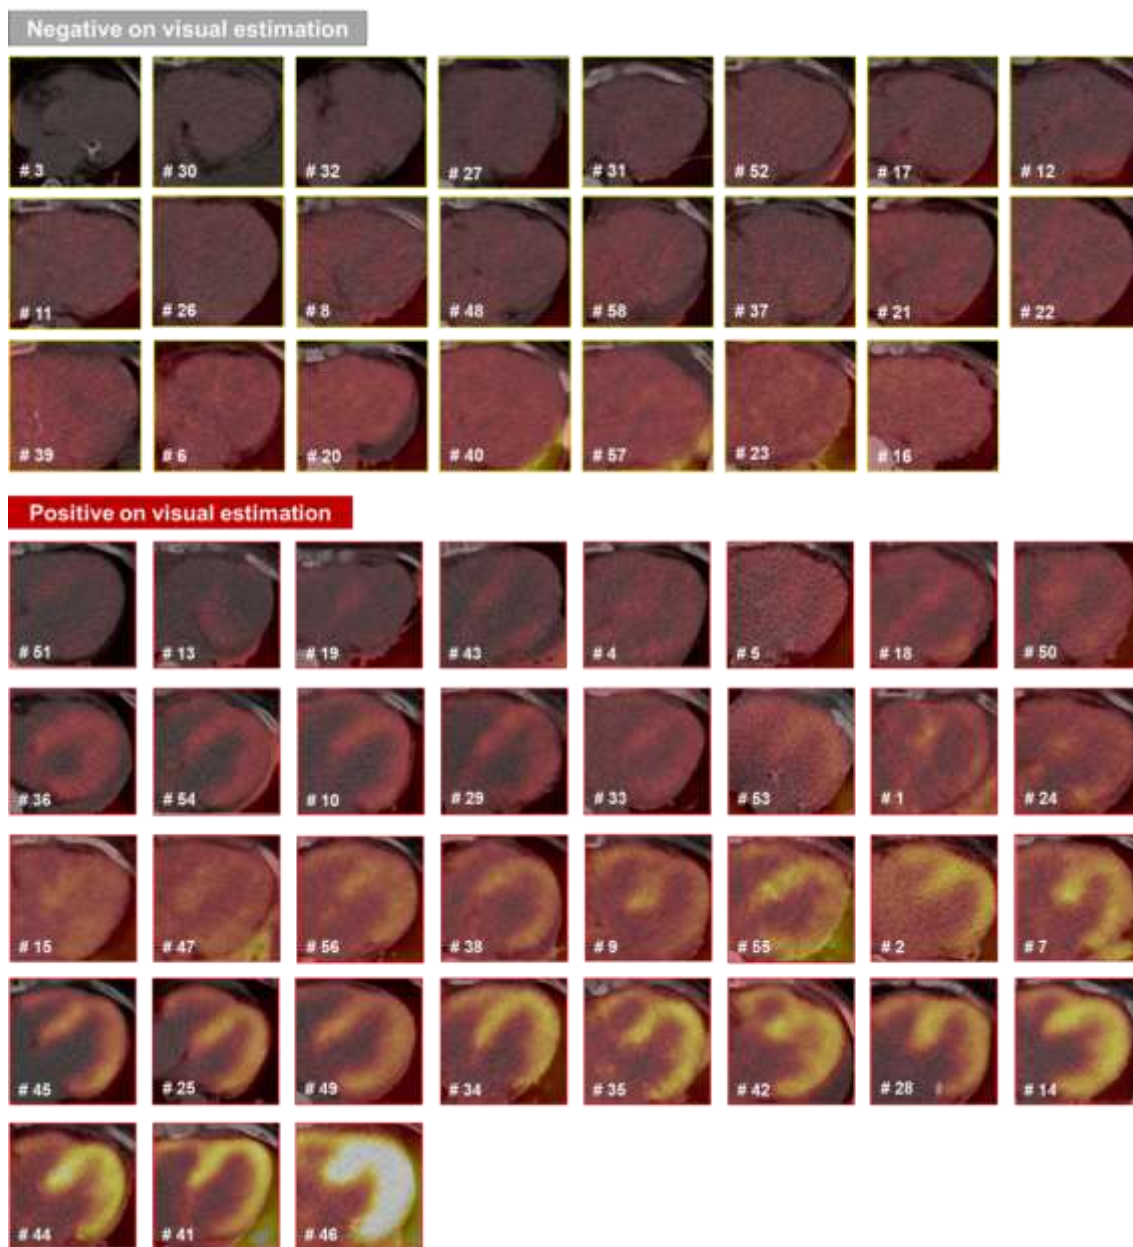

**Supplemental Figure 2. Images of  $^{11}\text{C}$ -PiB PET/CT for all patients with ALCA in this study.**

The upper panels contain the  $^{11}\text{C}$ -PiB PET/CT images interpreted as negative, whereas the lower panels contain those interpreted as positive. The number in the image indicates the subject number of each patient.

<sup>11</sup>C-PiB PET/CT, <sup>11</sup>C-Pittsburgh compound B positron emission tomography/computed tomography; ALCA, light chain type cardiac amyloidosis.

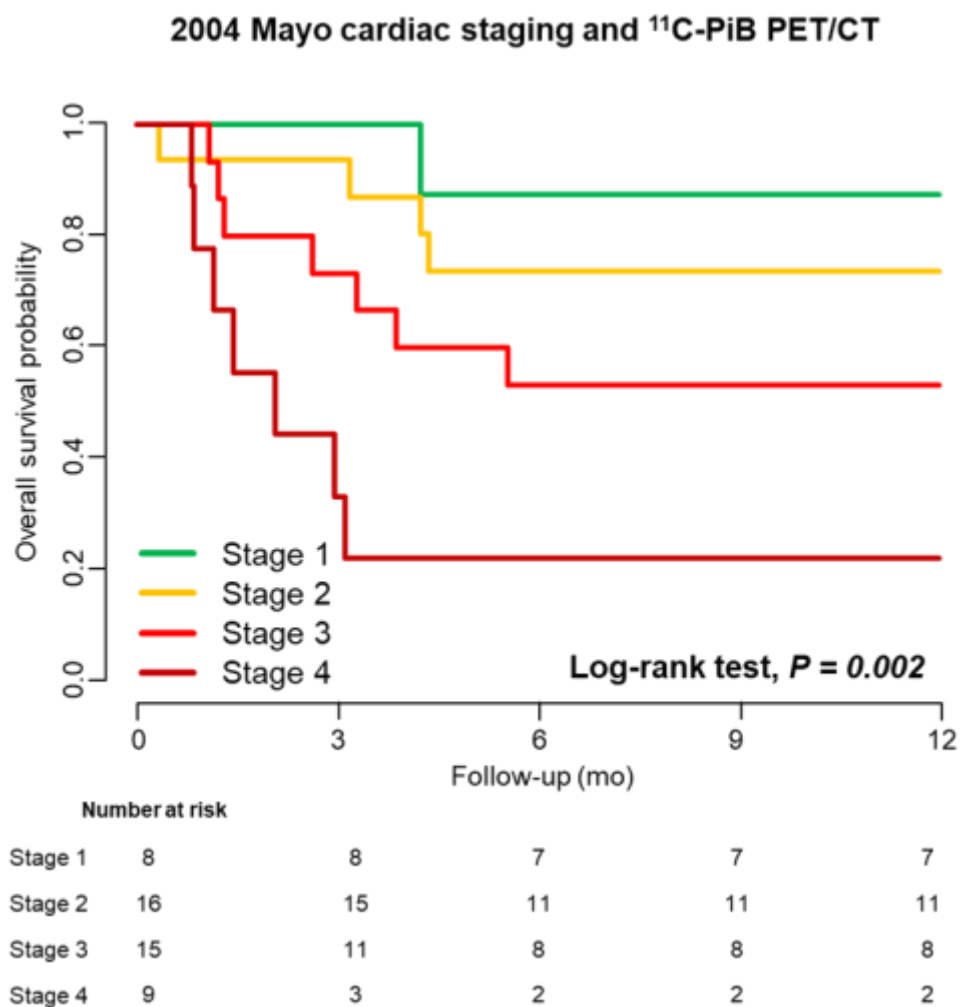

**Supplemental Figure 3. Kaplan-Meier curves for 1-year overall survival in patients with ALCA stratified by 2004 Mayo cardiac staging system combined with <sup>11</sup>C-PiB PET/CT.**

Kaplan-Meier survival curves of patients with ALCA, stratified by a 4-stage system incorporating <sup>11</sup>C-PiB PET/CT findings with the 2004 Mayo cardiac staging system. The 4-stage system allocated 1 point for each abnormal variable, such as elevated troponin I, NT-proBNP or a positive myocardial <sup>11</sup>C-PiB uptake.

<sup>11</sup>C-PiB PET/CT, <sup>11</sup>C-Pittsburgh compound B positron emission tomography/computed tomography; ALCA, light-chain type cardiac amyloidosis; NT-proBNP, N-terminal pro B-type natriuretic peptide.
